# Supplementary material for: Dynamic DNAN6-adenine methylation (6mA) governs the encystment process, showcased in the unicellular eukaryotePseudocohnilembus persalinus
Source: HighWire-hosted journal article supplement (doi:10.1101/gr.278796.123), 2024-02-01
Supplement: Supplemental_Table_S1.docx [file Supplemental_Table_S1.docx]

Table S1. Distribution of 6mA in genes transcribed by three RNA polymerases (Pol).

|  | Pol II | | Pol I | | Pol III | |
| --- | --- | --- | --- | --- | --- | --- |
| Trophont | Cyst | Trophont | Cyst | Trophont | Cyst |
| Symmetric 6mA | 282,922 | 64,310 | 0 | 0 | 0 | 0 |
| Asymmetric 6mA | 46,422 | 50,102 | 2 | 0 | 0 | 0 |
| Non-ApT | 2,798 | 202 | 4 | 1 | 1 | 0 |
| Low methylation | 158 | 9 | 0 | 0 | 0 | 0 |
| Intermediate methylation | 112,539 | 13,562 | 6 | 1 | 1 | 0 |
| High methylation | 219,424 | 101,038 | 0 | 0 | 0 | 0 |
