# Supplementary material for: Dynamic DNAN6-adenine methylation (6mA) governs the encystment process, showcased in the unicellular eukaryotePseudocohnilembus persalinus
Source: HighWire-hosted journal article supplement (doi:10.1101/gr.278796.123), 2024-02-01
Supplement: Supplemental_Table_S2.docx [file Supplemental_Table_S2.docx]

Table S2. log2(FoldChange) of *PpAMT*s and six homologues of putative demethylases from the AlkB family.

| Gene name | Gene ID | log2FoldChange |
| --- | --- | --- |
| *PpAMT1* | veg-cyst.13879.1 | -2.47260 |
| *PpAMT2* | veg-cyst.11999.1 | -1.30768 |
| *PpAMT3* | veg-cyst.4199.1 | -1.69158 |
| *PpAMT4* | veg-cyst.6031.1 | -1.32508 |
| *PpAMT7* | veg-cyst.12304.1 | -2.98596 |
| homologues of putative demethylases from the AlkB family | veg-cyst.10616.1 | -0.61126 |
| veg-cyst.11433.1 | -0.72537 |
| veg-cyst.3093.1 | 0.204288 |
| veg-cyst.4568.1 | -0.96158 |
| veg-cyst.6689.1 | 0.711687 |
| veg-cyst.8928.1 | -0.43558 |
