# Supplementary material for: Dynamic DNAN6-adenine methylation (6mA) governs the encystment process, showcased in the unicellular eukaryotePseudocohnilembus persalinus
Source: HighWire-hosted journal article supplement (doi:10.1101/gr.278796.123), 2024-02-01
Supplement: Supplemental_Table_S3.docx [file Supplemental_Table_S3.docx]

Table S3. Statistical analysis of the cyst formation process

| Cell state | | normal | | 0%<cyst<50% | | 50%<cyst<100% | |
| --- | --- | --- | --- | --- | --- | --- | --- |
| Sample | Time (day) | number | percentage* | number | percentage* | number | percentage* |
| Control-1 | 1 | 46 | 95.83% | 2 | 4.17% | 0 | 0.00% |
| 3 | 25 | 52.08% | 23 | 47.92% | 0 | 0.00% |
| 5 | 0 | 0.00% | 44 | 91.67% | 4 | 8.33% |
| Control-2 | 1 | 47 | 97.92% | 1 | 2.08% | 0 | 0.00% |
| 3 | 24 | 50.00% | 24 | 50.00% | 0 | 0.00% |
| 5 | 0 | 0.00% | 42 | 87.50% | 6 | 12.50% |
| Control-3 | 1 | 47 | 97.92% | 1 | 2.08% | 0 | 0.00% |
| 3 | 23 | 47.92% | 25 | 52.08% | 0 | 0.00% |
| 5 | 0 | 0.00% | 43 | 89.58% | 5 | 10.42% |
| 1-A-1 | 1 | 41 | 85.42% | 7 | 14.58% | 0 | 0.00% |
| 3 | 12 | 25.00% | 32 | 66.67% | 4 | 8.33% |
| 5 | 0 | 0.00% | 22 | 45.83% | 26 | 54.17% |
| 1-A-2 | 1 | 42 | 87.50% | 6 | 12.50% | 0 | 0.00% |
| 3 | 7 | 14.58% | 35 | 72.92% | 6 | 12.50% |
| 5 | 0 | 0.00% | 17 | 35.42% | 31 | 64.58% |
| 1-A-3 | 1 | 42 | 87.50% | 6 | 12.50% | 0 | 0.00% |
| 3 | 9 | 18.75% | 34 | 70.83% | 5 | 10.42% |
| 5 | 0 | 0.00% | 23 | 47.92% | 25 | 52.08% |
| 16-B-1 | 1 | 40 | 83.33% | 8 | 16.67% | 0 | 0.00% |
| 3 | 9 | 18.75% | 31 | 64.58% | 8 | 16.67% |
| 5 | 0 | 0.00% | 24 | 50.00% | 24 | 50.00% |
| 16-B-2 | 1 | 41 | 85.42% | 7 | 14.58% | 0 | 0.00% |
| 3 | 10 | 20.83% | 30 | 62.50% | 8 | 16.67% |
| 5 | 0 | 0.00% | 25 | 52.08% | 23 | 47.92% |
| 16-B-3 | 1 | 42 | 87.50% | 6 | 12.50% | 0 | 0.00% |
| 3 | 9 | 18.75% | 32 | 66.67% | 7 | 14.58% |
| 5 | 0 | 0.00% | 19 | 39.58% | 29 | 60.42% |

* The number of wells with the corresponding state over the total number of wells (48 wells in total).
