# Supplementary material for: Dynamic DNAN6-adenine methylation (6mA) governs the encystment process, showcased in the unicellular eukaryotePseudocohnilembus persalinus
Source: HighWire-hosted journal article supplement (doi:10.1101/gr.278796.123), 2024-02-01
Supplement: Supplemental_Table_S4.docx [file Supplemental_Table_S4.docx]

Table S4. List of gene sequences

Sequence of *PpAMT1*

>Protein sequence

MASYLQKQIQQKNNKLKNSDKDIQNKSLNIKRTIKNIEQDKNKNKIKEKLDDSKIKGRKQVKKSEESENDNDNEHTSNEEEEQDEQTSKNSSENENDGENSDQLEENSEEEEESSDDDNNSNNNSNNSEQNQQRQKRSAVKKIKSYKKLKNLQYKDEIDIDEEELNGVDDMNEINGNQNDNSKLINSKSYNQEMQADEEEILDKFPKNLRALEKMLEKVNERLDHYKEKYFEEWEHAQNNKSNVGDNAVPICADIRTFDWQFLKDQQMKHGGKMFDVIMMDPPWQLSTSQPSRGVAIAYDSLVDDIIQSMPIQTLQNDGFIFIWAINAKYRISVKIMEQWGYKLIDEIAWVKKTVNGKIAKGHGFYLQHAKESCLIGVKGNVDIERFKKNIASDIIFSERRGQSQKPEEIYEYAEQLVPNGFYLEVFGRRNNLRSNWITIGNEL

>Gene (introns are marked in orange)

ATGGCTTCTTATTTATAGAAATAAATATAGCAAAAAAATAACAAACTTAAAAATTCCGATAAAGATATTCAAAACAAATCTTTAAACATCAAAAGAACAATTAAAAATATAGAACAAGATAAAAATAAAAATAAAATTAAAGAAAAATTGGATGATTCAAAAATAAAAGGCAGAAAATAAGTTAAAAAAAGTGAAGAATCAGAAAATGATAATGATAATGAACATACAAGTAATGAAGAAGAAGAATAAGATGAATAAACGTCAAAAAATTCTAGTGAAAATGAAAATGATGGGGAAAATTCTGATTAATTAGAGGAAAATTCAGAGGAAGAAGAGGAAAGTAGTGATGATGATAATAATAGCAATAATAATAGTAATAATAGTGAATAAAATTAATAAAGATAAAAAAGAAGTGCAGTCAAAAAAATAAAATCTTATAAAAAATTAAAGAATTTGTAATATAAAGATGAAATTGACATAGATGAGGAAGAGTTAAATGGAGTTGATGATATGAATGAAATAAATGGAAATTAAAATGATAATTCTAAATTAATTAATAGTAAAAGCTATAATTAAGAAATGTAGGCCGATGAAGAAGAAATTTTAGATAAATTTCCTAAAAATTTGAGAGCTTTAGAAAAAATGTTAGAAAAGGTTAACGAAAGATTAGATCATTATAAAGAAAAGTATTTTGAAGAGTGGGAACATGCTTAGAATAACAAATCTAATGTCGGTGATAATGCCGTCCCTATATGTGCAGATATAAGGTATATAAAAAATTCATAAATCATATATATATTAATATTATTTTATTATAAATAAATTATTATTATTTTTTAATTTTAAAATAAATGAGTATAATCAAACTTTTATACATATATTTATAGAACTTTTGATTGGCAATTCTTAAAAGATTAACAAATGAAACATGGTGGTAAAATGTTCGATGTAATTATGATGGATCCTCCTTGTAATTAATAATTAAAAAAATTTAATGAAGAAAAATTTTTTAATAAAAATATTTATATATAATTATACCTATTTAAAGTAAAAATTTTTAATTTTATGTTTAGGGTAACTTAGTACCAGTTAGCCTTCAAGAGGAGTCGCTATTGCTTATGATAGTTTAGTAGATGATATAATTTAAAGCATGCCAATTTAAACTTTATAGAATGATGGCTTTATATTTATATGGGCAATCAATGCTAAATACAGAATTTCGGTTAAAATTATGGAATAGTGGGGTTACAAATTAATTGATGAAATCGCTTGGGTGAAAAAAACAGTAAATGGAAAAATAGCAAAAGGACATGGATTTTATTTATAGCATGCAAAAGAAAGTTGTTTGATTGGGGTTAAGGTAATTTAAAATAAAAAATATCTAAATTTTAAAATTTTAATATATTATAAAATTATAATAAGTTAAAATCCTAAAATAGATTAAAAAAATTTATATGTTTGTTAAAATTTTTTATTAATTTTAGGGAAATGTTGATATAGAAAGATTTAAAAAAAATATAGCTAGCGATATTATTTTCAGCGAAAGAAGGGGGTAAAGTTAAAAGCCCGAAGAAATATACGAATATGCTGAATAATTAGTTCCTAATGGTAAAAAATATTCAAATTAATAAATTTTTAAAATAAATTGATATATTTACTAAAATATTTATTATTATGTTTAGGATTTTATTTGGAAGTTTTTGGAAGAAGAAATAATTTAAGATCTAATTGGATAACAATCGGAAACGAACTTTGA

>CDS

ATGGCTTCTTATTTATAGAAATAAATATAGCAAAAAAATAACAAACTTAAAAATTCCGATAAAGATATTCAAAACAAATCTTTAAACATCAAAAGAACAATTAAAAATATAGAACAAGATAAAAATAAAAATAAAATTAAAGAAAAATTGGATGATTCAAAAATAAAAGGCAGAAAATAAGTTAAAAAAAGTGAAGAATCAGAAAATGATAATGATAATGAACATACAAGTAATGAAGAAGAAGAATAAGATGAATAAACGTCAAAAAATTCTAGTGAAAATGAAAATGATGGGGAAAATTCTGATTAATTAGAGGAAAATTCAGAGGAAGAAGAGGAAAGTAGTGATGATGATAATAATAGCAATAATAATAGTAATAATAGTGAATAAAATTAATAAAGATAAAAAAGAAGTGCAGTCAAAAAAATAAAATCTTATAAAAAATTAAAGAATTTGTAATATAAAGATGAAATTGACATAGATGAGGAAGAGTTAAATGGAGTTGATGATATGAATGAAATAAATGGAAATTAAAATGATAATTCTAAATTAATTAATAGTAAAAGCTATAATTAAGAAATGTAGGCCGATGAAGAAGAAATTTTAGATAAATTTCCTAAAAATTTGAGAGCTTTAGAAAAAATGTTAGAAAAGGTTAACGAAAGATTAGATCATTATAAAGAAAAGTATTTTGAAGAGTGGGAACATGCTTAGAATAACAAATCTAATGTCGGTGATAATGCCGTCCCTATATGTGCAGATATAAGAACTTTTGATTGGCAATTCTTAAAAGATTAACAAATGAAACATGGTGGTAAAATGTTCGATGTAATTATGATGGATCCTCCTTGGTAACTTAGTACCAGTTAGCCTTCAAGAGGAGTCGCTATTGCTTATGATAGTTTAGTAGATGATATAATTTAAAGCATGCCAATTTAAACTTTATAGAATGATGGCTTTATATTTATATGGGCAATCAATGCTAAATACAGAATTTCGGTTAAAATTATGGAATAGTGGGGTTACAAATTAATTGATGAAATCGCTTGGGTGAAAAAAACAGTAAATGGAAAAATAGCAAAAGGACATGGATTTTATTTATAGCATGCAAAAGAAAGTTGTTTGATTGGGGTTAAGGGAAATGTTGATATAGAAAGATTTAAAAAAAATATAGCTAGCGATATTATTTTCAGCGAAAGAAGGGGGTAAAGTTAAAAGCCCGAAGAAATATACGAATATGCTGAATAATTAGTTCCTAATGGATTTTATTTGGAAGTTTTTGGAAGAAGAAATAATTTAAGATCTAATTGGATAACAATCGGAAACGAACTTTGA

Sequence of *PpAMT7*

>Protein sequence

MAEVEVVSSRNLRKRTPLRQMKLNFQEIGKSSHMQKYYGYNEEENIIKKPKRKSKRAPLTKKKPNKNYAYGQELDEMLNMGVKKKVKTVVKKEKEPDNNLTCLIGWRKDIKLDQVSEKQQLHRNIVVPKLSKVDFSKFVKDLQAIYINIDWSQDEQIQNQQIQDLRSLQLENKKILRNGIIFIWTQKEQMAEIMNIMDEKQFVYIENFTSVQLSLQKCEEFLQNEQNKKKKTDILSFFENKALKKQTLTDPKGLSLEQRKKNVLENLDKIKEYNINDIIYKGDSKFFRQSKKILLMFRRQIDKSVQLELRHQRTSDVVFDLVDENQANKLDDQSQQYVYNMIETLLPKARIGIENDQFKMMEIYGNSQKPRDHWICFNQKE

>Gene (introns are marked in orange)

ATGGCAGAAGTAGAAGTAACTTAAATTATATATATATTACCATTAAAATAATAAAATTTTAGGTCGTAAGCTCAAGAAATTTGAGAAAAAGAACACCTTTACGATAAATGAAGTAAAATTGTTTTTTATTATTTAGTTTCTAAATATTAAATATTAATAGTTTGTATACATAGTTTGTATTCATACACATAAATTAATACATAAAATAAAAAAATTTATCATAAACAGGTTAAACTTCTAAGAAATAGGAAAATCTTCACATATGTAAAAATATTATGGGTATAATGAGGTAAAATTTATTATAAATTAAAAGTTTAATTTACTAAAATGAACTTTCATTTGCTTATACTAGGCATTTTTAGTGTTTCATTTATTCTAATTAATTATTCAAAAAAAAAAAAAAAAAAAGACTAAAAAATATTATAAGTTTTTTTAGCCATAAATAAACCTTCTAAAAATATTAAAAAACAATTATGAAACTAAAATTTTTAATGGTAAATTTAATTTTTTATGTATTTTTAGGAGGAAAATATAATTAAGAAGCCCAAAAGAAAGTCCAAGAGGGCCCCATTAACAAAAAAAAAACCTAATAAAAATTATGCTTATGGATAAGAATTAGACGAAATGTTAAATATGGGAGTTAAAAAAAAAGTTAAAACTGTTGTTAAAAAAGAAAAGTAACATAATAATTTTATGTCGAAATTCAACATTTTTTATTCATTTTTAGTTATTTAAGTAAATTTTTACTTTACAAAACTCAATTAATTTTTATTTTTCAAAACATATACATACATTCTAAAGAATAAATTTATATTTTAGTATTGATAAACAAAATTTAAAAATGATATAAATTTAAAATTATGATACTAATAAATATTTTAAAATCAATTCATACAATTAATGGCATTAAACTTAAATTAATTCTGGATTTTATTGTATTTCATTAAAAAAATTTTGAATATTTTTAAAATAAGAAAAATAAGATTGATTAGAAAATTTATAATTTGTTTATCTTTAATTATATTAAAATTTTAATAAATTTTAGTTTTCATAATTTTTTCATTATTAGGGAACCTGATAATAATTTAACTTGTCTTATTGGGTGGAGAAAAGATATAAAACTGGATTAAGTATCCGAAAAATAACAATTACATAGGTAAAATATTATAAATATAACTTAAATTAAAAATGTTTAAAGGAAAATTTAATTTTATTAAATAATGTAGAAATATAGTGGTACCTAAGTTGTCAAAAGTTGATTTTTCAAAATTCGTAAAAGATCTTTAAGCCATATATATAAATATTGATTGGAGCTAAGATGAATAAATATAAAATTAATAAATTTAAGACTTAAGAAGTTTATAATTAGAAAATAAAAAAATTTTAAGAAATGGAATTATATTCATTTGGACATAAAAAGAATAAATGGCCGAAATAATGAATATAATGGACGAAAAATAATTTGTATATATAGAAAATTTTACATCTGTTTAACTTTCCTTATAAAAGTGTGAAGAATTTTTATAAAATGAATAAAATAAAAAGAAAAAAACCGACATTTTAAGCTTTTTTGAAAATAAAGCTCTTAAAAAACAAACCCTAACTGATCCTAAAGGATGTAAAAATATTTAAAAGCGAAATGATTCTATTTATATTATAATTAATTTAATTTTTCAATTAAATAGTAAGTCTTGAGTAAAGAAAAAAAAATGTATTAGAGAACTTAGATAAAATAAAAGAATATAATATAAATGATATAATATATAAAGGGGACTCTAAATTTTTTAGATAATCAAAAAAAATACTCTTAATGTTTAGAAGATAAATTGATAAATCAGTTTAACTTGAACTTAGACATCAAAGAACCAGTGACGTTGTTTTTGATTTAGTTGACGAAAATTAAGCCAATAGTAAAAATAAAAATACATATTTAATAATAAATTAAATTTAAGATATAAATTTAAATGAATATTAAACTATATATTATATAAATTTTTAACAATAATTATTAATCTTTAGAGTTAGATGATTAATCTTAACAATATGTATATAATATGATAGAAACATTACTCCCTAAAGCTAGAATCGGGATAGAAAATGATTAATTTAAAATGATGGAAATGTAATAAATAATTTTAGTTTTATTTTTTGTTTTTTACTATTTTTTTCAATTATTTATCTAGAGTTTAAATAAATTTAAATTATAATTTATTTTTAAGATACGGAAATAGTCAAAAACCAAGAGATCACTGGATTTGTTTCAATTAAAAAGAATGA

>CDS

ATGGCAGAAGTAGAAGTCGTAAGCTCAAGAAATTTGAGAAAAAGAACACCTTTACGATAAATGAAGTTAAACTTCTAAGAAATAGGAAAATCTTCACATATGTAAAAATATTATGGGTATAATGAGGAGGAAAATATAATTAAGAAGCCCAAAAGAAAGTCCAAGAGGGCCCCATTAACAAAAAAAAAACCTAATAAAAATTATGCTTATGGATAAGAATTAGACGAAATGTTAAATATGGGAGTTAAAAAAAAAGTTAAAACTGTTGTTAAAAAAGAAAAGGAACCTGATAATAATTTAACTTGTCTTATTGGGTGGAGAAAAGATATAAAACTGGATTAAGTATCCGAAAAATAACAATTACATAGAAATATAGTGGTACCTAAGTTGTCAAAAGTTGATTTTTCAAAATTCGTAAAAGATCTTTAAGCCATATATATAAATATTGATTGGAGCTAAGATGAATAAATATAAAATTAATAAATTTAAGACTTAAGAAGTTTATAATTAGAAAATAAAAAAATTTTAAGAAATGGAATTATATTCATTTGGACATAAAAAGAATAAATGGCCGAAATAATGAATATAATGGACGAAAAATAATTTGTATATATAGAAAATTTTACATCTGTTTAACTTTCCTTATAAAAGTGTGAAGAATTTTTATAAAATGAATAAAATAAAAAGAAAAAAACCGACATTTTAAGCTTTTTTGAAAATAAAGCTCTTAAAAAACAAACCCTAACTGATCCTAAAGGATTAAGTCTTGAGTAAAGAAAAAAAAATGTATTAGAGAACTTAGATAAAATAAAAGAATATAATATAAATGATATAATATATAAAGGGGACTCTAAATTTTTTAGATAATCAAAAAAAATACTCTTAATGTTTAGAAGATAAATTGATAAATCAGTTTAACTTGAACTTAGACATCAAAGAACCAGTGACGTTGTTTTTGATTTAGTTGACGAAAATTAAGCCAATAAGTTAGATGATTAATCTTAACAATATGTATATAATATGATAGAAACATTACTCCCTAAAGCTAGAATCGGGATAGAAAATGATTAATTTAAAATGATGGAAATATACGGAAATAGTCAAAAACCAAGAGATCACTGGATTTGTTTCAATTAAAAAGAATGA

Sequence of *g10245*

>Protein sequence

MQYNYPNLEEENNQVSVQQPTAPTCYALSCYQSLCRKVPTNYILLFIFTFSQSYLLAATVLQYDVQSVLLAGGITFFMFLGITTYALWTKEDFTIKGGSLFMGLITLSGGLLLNMFIQSSFVNLMLNVGFIFLFGIYLIYDTQMIVGGHKHSFTYDDYIIAALQMYIDIINIFLYTLRLFGKSDN

>Gene (introns are marked in orange)

ATGCAATATAATTACCCAAATTTGGAAGAGGAAAATAATTAAGTTTCTGTATAATAGCCCACAGCTCCCGTATTTAATTAATCTCACTAAGTTAATTAAAATTAAAATCCTTAGCAAAATTATGGGCCAAACAATTATTATCCTGGATTTAACTAGCCATAAATGTAAGCCTAACAAATGGTTTACCCTTAAAATTAAAATCAAAATTAAAATCATTATTAATAATAATAACAACCAAATAATAATGTAGTTGGGTTTGCGGATAATTTTTAGTAAGGATTGAATTTGGGAACTAAATAATAATTTATGCATAATTATGGTCGTGATACTGAAAACCAGATAGGAAATCATAATAATAATAACTATTTTCATGACTAGGATTATAAAGGAGAAGATAGCGATATTAGTTAAATGTATGGATAAGAAGATATTGGGAGCTTATCTAAAGGATAATAAATAAAATTCATTAGAAAAGTTTATTTAATATTATTAACGCAAATTGCAATTAGTTGCCTATTCGTAGTTTAGGCTAAAGAAAGTAGAGAATTTAAATATTTTATTATTAGAAATCCATTCGTAACAGTATTGTCCTTGATTGCGTTAACAGTTGTAAAAAATATATTATATTTATTTTAGTATTTTAATAAAAAGATATTTTTAAATACACTCTATTTATAAAAATAATAAATAAAAATCTTTTATTAATTTTTTATTTATTTAGACATGTTATGCGTTATCTTGCTACTAGTCTTTATGCAGAAAAGTTCCTACTAATTACATATTATTATTTATATTTACTTTTAGTCAGTCGTATTTATTAGCAGCAACTGTATTATAATATGACGTATAATCTGTAAAAATATATTCAGTTACAAAATTAAATTATAAAATAATCATTTACACATTATAAAATTAAAAAAATAAAAATCCTTATAAAACTAATAATTTATAATTCTTACTTTTATTTTTGTATCAATTTTTAAATTAATCATTAGGTTTTATTAGCAGGAGGAATAACATTTTTCATGTTTTTAGGAATAACAACTTATGCATTATGGACTAAAGAGGACTTTACCATAAAAGGTGGGTCCTTATTTATGGGTTTAATAACTTTATCAGGAGGACTTTTATTGAACATGTTTATATAGTCATCATTTGTAAATTTAATGCTCAATGTAGGTTTTATTTTTTTGTTTGGAATATATTTAATATATGATACACAAATGATAGTTGGAGGACATAAACACTCATTTACCTATGATGATTATATCATTGCAGCTTTATAAATGTATATAGATATTATAAATATATTTTTATATACTCTTAGATTGTTTGGAAAAAGTGATAATTGA

>CDS

ATGCAATATAATTACCCAAATTTGGAAGAGGAAAATAATTAAGTTTCTGTATAATAGCCCACAGCTCCCACATGTTATGCGTTATCTTGCTACTAGTCTTTATGCAGAAAAGTTCCTACTAATTACATATTATTATTTATATTTACTTTTAGTCAGTCGTATTTATTAGCAGCAACTGTATTATAATATGACGTATAATCTGTTTTATTAGCAGGAGGAATAACATTTTTCATGTTTTTAGGAATAACAACTTATGCATTATGGACTAAAGAGGACTTTACCATAAAAGGTGGGTCCTTATTTATGGGTTTAATAACTTTATCAGGAGGACTTTTATTGAACATGTTTATATAGTCATCATTTGTAAATTTAATGCTCAATGTAGGTTTTATTTTTTTGTTTGGAATATATTTAATATATGATACACAAATGATAGTTGGAGGACATAAACACTCATTTACCTATGATGATTATATCATTGCAGCTTTATAAATGTATATAGATATTATAAATATATTTTTATATACTCTTAGATTGTTTGGAAAAAGTGATAATTGA
