# Supplementary material for: Dynamic DNAN6-adenine methylation (6mA) governs the encystment process, showcased in the unicellular eukaryotePseudocohnilembus persalinus
Source: HighWire-hosted journal article supplement (doi:10.1101/gr.278796.123), 2024-02-01
Supplement: Supplemental_Table_S5.docx [file Supplemental_Table_S5.docx]

Table S5. List of primers

| Plasmid construction for RNAi | | |
| --- | --- | --- |
| Primers | Sequences (5'-3') | Notes |
| PpAMT1_*Hind*III_f2723 | GGTCGACGGTATCGATAAGCTTCTAATGTCGGTGATAATGCCGTCC | For constructing PpAMT1-1-A RNAi plasmid |
| PpAMT1AMT1_*Xba*l_r3221 | CCGCGGTGGCGGCCGCTCTAGACCCACTATTCCATAATTTTAACC |
| PpAMT1AMT1_*Hind*III_f2723 | GGTCGACGGTATCGATAAGCTTCTAATGTCGGTGATAATGCCGTCC | For constructing PpAMT1-16-B RNAi plasmid |
| PpAMT1AMT1_*Xba*l_r3330 | CCGCGGTGGCGGCCGCTCTAGACCCCAATCAAACAACTTTCTTTTGC |
| *PpAMT1* qRT-PCR | | |
| Primers | Sequences (5'-3') | Notes |
| PpAMT1_f2565 | GCTATAATTAAGAAATGTAGGCCG | For qRT-PCR test of *PpAMT1* expression level |
| PpAMT1_r3086 | CGACTCCTCTTGAAGGCTAACTG |
| P.p_g10245_f3042 | CAACTTATGCATTATGGACTAAAG | Internal control for qRT-PCR test of *PpAMT1* expression level |
| P.p_g10245_r3233 | GGTAAATGAGTGTTTATGTCCTCC |
| Verification of the *PpAMT1* gene annotation | | |
| Primers | Sequences (5'-3') | Notes |
| PpAMT1_f0001 | ATGGCTTCTTATTTATAGAAATAAATAT | For RT-PCR of *PpAMT1* cDNA sequence |
| PpAMT1_r2576 | CTTCTTCATCGGCCTACATTTC |
| PpAMT1_f2485 | GGAAGAGTTAAATGGAGTTGATG |
| PpAMT1_r2948 | CAAGGAGGATCCATCATAATTAC |
| PpAMT1_f2944 | CGATGTAATTATGATGGATCCTCC |
| PpAMT1_r3521 | CGCTGAAAATAATATCGCTAGC |
| PpAMT1_f3520 | GCTAGCGATATTATTTTCAGCG |
| PpAMT1_r3730 | CAAAGTTCGTTTCCGATTGTTATCC |
| SSU rDNA amplification and sequencing | | |
| Primers | Sequences (5'-3') | Notes |
| 82F | GAAACTGCGAATGGCTC | For PCR of *Pseudocohnilembus persalinus* and *Tetrahymena thermophila* SSU rDNA |
| 18s-R | TGATCCTTCTGCAGGTTCACCTAC |
| Amplification of telomere sequences | | |
| Primers | Sequences (5'-3') | Notes |
| tig_5tF | CAACCCCAACCCCAACC | For PCR of ten telomere sequences to further refine the genome assembly |
| tig00015662_5tR | CTCTATTTATTAACTCATTTGC |
| tig_5tF | CAACCCCAACCCCAACC |
| tig00000230_5tR | GCATCGGATATTTCGATTGCTG |
| tig_5tF | CAACCCCAACCCCAACC |
| tig00001329_5tR | GACAATTTTAGGCCAACAAC |
| tig_5tF | CAACCCCAACCCCAACC |
| tig00001341_5tR | GCACAAAAACCCCCATTAAC |
| tig5tR | CCAACCCCAACCCCAACCCC |
| tig00000209_5tF | GTAGCCATACATCTTAAATGCCAC |
| tig5tR | CCAACCCCAACCCCAACCCC |
| tig00000663_5tF | GGTGTTACGGGGATAGACGACCC |
| tig3tR | GGGGTTGGGGTTGGGGTTGG |
| tig00000230_3tF | GTCGTACATCAAAGACTCAGAG |
| tig3tR | GGGGTTGGGGTTGGGGTTGG |
| tig00001024_3tF | GCTTGAACACCATATGCTATATC |
| tig3tR | GGGGTTGGGGTTGGGGTTGG |
| tig00001329_3tF | CCGCTAAAATGCAAAAAACAAT |
| tig3tR | GGGGTTGGGGTTGGGGTTGG |
| tig00001337_3tF | GTTAATGGGGGTTTTTGTGC |
| *Dpn*I/*Dpn*II digestion and quantitative PCR (qPCR) analysis | | |
| Primers | Sequences (5'-3') | Notes |
| PoI-II-high13-F | ATGCAACATTCCTTAATTTTGATGGT | For qPCR of H1 (high methylation site) |
| PoI-II-high13-R | GAATTGGTTCTTAAAGAGGACAAAATTC |
| PoI-II-high6-F | TCCCTATACAAATATAATAAGATGAAGA | For qPCR of H2 (high methylation site) |
| PoI-II-high6-R | TTCGGGAACTACTTCATTTTAGTT |
| PoI-II-intermediate6-F | CATCCTAGTCTTATTCGGAAGACG | For qPCR of I1 (intermediate methylation site) |
| PoI-II-intermediate6-R | GAAGAGTAAAATTCAGACACTATTGC |
| PoI-II-intermediate2-F | AACACTATACCCTAGCAAACAGTT | For qPCR of I1 (intermediate methylation site) |
| PoI-II-intermediate2.2-R | CACCATAAAAGTGTTCATCTAATTCT |
| PoI-II-no2-F | CTACAATAACAGGTTATCTTATCG | For qPCR of N1 (no methylation site) |
| PoI-II-no2-R | TACCATTGAAGGACTTTATACAGCAT |
| PoI-II-no4-F | TAGCTATTTAGCTATGTAATGCCCTA | For qPCR of N2 (no methylation site) |
| PoI-II-no4-R | AGTCACATTTAGTAATATCTTTCTCC |
| PoI-I-no3-F | CCCTTTACGCCCAGTTATTCCG | For qPCR of N3 (no methylation site) |
| PoI-I-no3-R | GAAAGATTGAACAACCACATTGGG |
| PoI-III-no2-F | CACTTAACTTATTTCAACAATGG | For qPCR of N4 (no methylation site) |
| PoI-III-no2-R | GGTTTAATGATGATAAATGATTC |
