# Supplementary material for: Dynamic DNAN6-adenine methylation (6mA) governs the encystment process, showcased in the unicellular eukaryotePseudocohnilembus persalinus
Source: HighWire-hosted journal article supplement (doi:10.1101/gr.278796.123), 2024-02-01
Supplement: Supplemental_Table_S6.docx [file Supplemental_Table_S6.docx]

Table S6. qPCR data

| Strains | Sample name | Gene name | Ct |
| --- | --- | --- | --- |
| *PpAMT1* knockdown cells | control | g10245 | 22.9849 |
| 22.6308 |
| 22.5781 |
| PpAMT1 | 22.5151 |
| 22.0583 |
| 21.9879 |
| 1-A | g10245 | 21.7982 |
| 21.7801 |
| 21.2931 |
| PpAMT1 | 21.7745 |
| 21.6776 |
| 21.6038 |
| 16-B | g10245 | 22.4982 |
| 22.2628 |
| 22.1788 |
| PpAMT1 | 23.4961 |
| 22.8883 |
| 22.5164 |
| *PpAMT7* knockdown cells | control | *g10245* | 19.7894 |
| 19.5824 |
| 19.5782 |
| *PpAMT7* | 16.7233 |
| 16.6470 |
| 16.5163 |
| *PpAMT7*-KD | *g10245* | 19.3086 |
| 19.2800 |
| 18.7244 |
| *PpAMT7* | 18.1194 |
| 17.8901 |
| 16.5619 |
| Trophont and cyst | Trophont | *g10245* | 26.2175 |
| 26.0951 |
| 26.0903 |
| 25.9657 |
| *PpAMT1* | 25.8912 |
| 25.8604 |
| 25.8594 |
| 25.8200 |
| Cyst | *g10245* | 26.2511 |
| 26.1681 |
| 26.1262 |
| 26.1198 |
| *PpAMT1* | 26.7532 |
| 26.6940 |
| 26.6551 |
| 26.6442 |

Parameters of the qPCR standard-curves

| Gene name | Slope value | Correlation coefficient (R2) | Amplification efficiency (E%) |
| --- | --- | --- | --- |
| *g10245* | -3.3417 | 0.9933 | 99.18 |
| *PpAMT1* | -3.4739 | 0.9817 | 94.03 |
| *PpAMT7* | -3.126 | 0.9954 | 108.88 |
