# Supplementary material for: Dynamic DNAN6-adenine methylation (6mA) governs the encystment process, showcased in the unicellular eukaryotePseudocohnilembus persalinus
Source: HighWire-hosted journal article supplement (doi:10.1101/gr.278796.123), 2024-02-01
Supplement: Supplemental_Table_S7.docx [file Supplemental_Table_S7.docx]

Table S7. The NCBI GI number of MT-A70 proteins used for phylogenetic tree construction in Fig. 5B

|  |  | **AMT1** | **AMT2/5** | **AMT3** | **AMT4** | **AMT6/7** | **METTL4** |
| --- | --- | --- | --- | --- | --- | --- | --- |
| Rhizaria | *Reticulomyxa filosa* | 569355952 |  |  |  | 569429466 |  |
| Stramenopiles | *Blastocystis hominis* | 300122443 |  |  |  | 300121574 |  |
| Apicomplexa | *Plasmodium falciparum* |  |  | 906521926 | 910273602 |  |  |
| Ciliates | *Tetrahymena thermophila* | 586728217 (**AMT1**) | 586735011 (**AMT2**)  586734668 (**AMT5**) | 89304141 (**AMT3**) | 586734236 (**AMT4**) | 586743342 (**AMT6**)  586727895 (**AMT7**) |  |
| *Paramecium tetraurelia* | 145476411  145544559 | 74830621 145473723 74830631 74830636 | 145499669 145492063 | 74830646 145534770 | 145487402 145546436 |  |
| *Pseudocohnilembus persalinus* | (**PpAMT1**) | (**PpAMT2**) | (**PpAMT3**) | (**PpAMT4**) | (**PpAMT7**) |  |
| Algae | *Chlamydomonas reinhardtii* | 159474530 1335048048 |  | 1335054311 | 159466562 1335048210 | 159480906 1335043186 |  |
| Plants | *Arabidopsis thaliana* |  |  | 4539001 | 73620975 |  | 18394726 |
| *Physcomitrella patens* |  |  | 1373907462 | 1333491572 |  | 1373923975 |
| Ameoba | *Acanthamoeba castellanii* | 440792815 | 440802961 |  |  | 440791284 440794060 |  |
| Basal fungi | *Anaeromyces robustus* | 1183359562 |  |  |  | 1183358173 |  |
| *Absidia repens* | 1183482424 |  |  |  | 1183497549 1183498450 | 1183491450 |
| True fungi | *Saccharomyces cerevisiae* |  |  | 1023945599 (KAR4) | 1322815  (IME4) |  |  |
| Animals | *Drosophila melanogaster* |  |  | 74869774 | 33301422 |  | 24647514 |
| *Caenorhabditis elegans* |  |  |  |  |  | 74962031 |
| *Danio rerio* |  |  | 82186021 | 45501238 |  | 189522093 |
| *Homo sapiens* |  |  | 24308265 | 21361827 |  | 84040265 |
